# Supplementary material for: Transcriptome Analyses Shed New Insights into Primary Metabolism and Regulation of Blumeria graminis f. sp. tritici during Conidiation
Source: Front Plant Sci. 2017 Jun 30;8:1146. doi: 10.3389/fpls.2017.01146 (PMC5492466; doi:10.3389/fpls.2017.01146)
Supplement: Supplementary file 7 [file Table_7.XLSX]

## Sheet: Note
Supplementary Table S7 Putative signaling proteins and transciption factors coding genes among the 685 DEGs
1	NS' meant the transcript was differentially expressed not significantly
2	PI' and 'NI' indicated the fold change of differential expression were positively and negatively infinite,respectively.
3	Identity' and 'E-value' were obtained from amino acid sequence alignment against putative signaling proteins and regulators in Blumeria graminis f. sp. Hordei (Bgh) described previously (Kusch et al., 2014)
4	Bgt accession No. ' indicated the accession No. of the protein code by the DEG in Bgt genome.
5	Bgh accession No. ' indicated the protein accession No. of the protein with significant match (E-value cutoff = 1.00E-10) in corresponding signaling pathways of Blumeria graminis f. sp. Hordei (Bgh) described previously (Kusch et al., 2014)
6	no hit' indicated the sequence alignment was not matched at cutoff E value of 1.00E-10

## Sheet: GPCRs-heterotrimeric G proteins
Code	DEG ID	Bgt accession No. in NCBI database	Log2(C4dpi/C3dpi)	Log2(C5dpi/C3dpi)	Bgh accession No. in NCBI database	Identity(%)	E-value	Interpro	TMMHs	COG class	COG class annotation	GO annotation	KEGG annotation	Swissprot annotation	Nr annotation	Putative function
G-protein-beta	Bgt_unigene4391	EPQ63648.1	NS	-1.04802	no hit	--	--	WD40/YVTN repeat-like-containing domain (IPR015943);WD40-repeat-containing domain (IPR017986);Small-subunit processome, Utp12 (IPR007148);WD40 repeat (IPR001680);G-protein beta WD-40 repeat (IPR020472);WD40 repeat, conserved site (IPR019775)	0	[R]	General function prediction only	Biological Process: mitotic cell cycle (GO:0000278);; Biological Process: transcription, DNA-templated (GO:0006351);; Biological Process: organelle organization (GO:0006996);; Biological Process: cell cycle process (GO:0022402);; Biological Process: regulation of cellular metabolic process (GO:0031323);; Biological Process: response to chemical (GO:0042221);; Cellular Component: protein complex (…	K14556|0.0|ssl:SS1G_03095|hypothetical protein	Uncharacterized WD repeat-containing protein C3D6.12 GN=SPBC3D6.12 OS=Schizosaccharomyces pombe (strain 972 / ATCC 24843) PE=1 SV=1	Hypothetical protein BGT96224_3461, partial [Blumeria graminis f. sp. tritici 96224]	Heterotrimeric G protein beta subunit
RGS	Bgt_unigene5992	EPQ61990.1	-1.42284	NS	CCU82385.1	94.32	0	RGS domain (IPR016137);	0	--	--	--	--	--	Hypothetical protein BGT96224_3902 [Blumeria graminis f. sp. tritici 96224]	Regulator of G protein signaling
GPCR1	Bgt_unigene1703	EPQ66253.1	NS	1.25079	CCU80480.1	93.26	0	no hit	7	--	--	--	--	--	Hypothetical protein BGT96224_5135 [Blumeria graminis f. sp. tritici 96224]	GPCR candidate
GPCR2	Bgt_unigene2027	EPQ65959.1	-1.01367	NS	CCU79798.1	95.95	0	no hit	6	--	--	--	--	--	Hypothetical protein BGT96224_5098 [Blumeria graminis f. sp. tritici 96224]	GPCR candidate
GPCR3	Bgt_unigene2167	EPQ65755.1	-1.65574	NS	CCU81626.1	85.08	0	no hit	6	--	--	--	--	Probable GPI-anchored adhesin-like protein PGA55 (Precursor) GN=PGA55 OS=Candida albicans (strain SC5314 / ATCC MYA-2876) PE=1 SV=1	Hypothetical protein BGT96224_5285, partial [Blumeria graminis f. sp. tritici 96224]	GPCR candidate
GPCR4	Bgt_unigene2409	EPQ65552.1	-1.21915	NS	CCU74839.1	85.38	0	Protein of unknown function DUF2434 (IPR018830);	7	--	--	--	--	Uncharacterized protein C56F8.12 GN=SPAC56F8.12 OS=Schizosaccharomyces pombe (strain 972 / ATCC 24843) PE=4 SV=1	Hypothetical protein BGT96224_4782 [Blumeria graminis f. sp. tritici 96224]	GPCR candidate
GPCR5	Bgt_unigene3140	EPQ64852.1	-1.46319	NS	CCU81853.1	24.05	2e-12	no hit	8	--	--	--	--	--	Hypothetical protein BGT96224_A20309 [Blumeria graminis f. sp. tritici 96224]	GPCR candidate

## Sheet: Small monomeric GTPases
Code	DEG ID	Bgt accession No. in NCBI database	Log2(C4dpi/C3dpi)	Log2(C5dpi/C3dpi)	Bgh accession No. in NCBI database	Identity(%)	E-value	Interpro	COG class	COG class annotation	GO annotation	KEGG annotation	Swissprot annotation	Nr annotation	Putative function
SmallG1	Bgt_unigene383	EPQ67594.1	-1.01866	NS	CCU82960.1	91.64	3e-156	F-BAR domain (IPR031160);FCH domain (IPR001060)	--	--	Cellular Component: intracellular (GO:0005622);; Biological Process: signal transduction (GO:0007165);;	--	RHO GTPase-activating protein RGD1 GN=RGD1 OS=Saccharomyces cerevisiae (strain ATCC 204508 / S288c) PE=1 SV=1	GTPase-activating protein (RhoGAP) [Blumeria graminis f. sp. tritici 96224]	Rho GTPase activating protein
SmallG2	Bgt_unigene434	EPQ67535.1	-1.014	NS	CCU74400.1	98.25	0	Neurofibromin (IPR028553);Armadillo-type fold (IPR016024);Rho GTPase activation protein (IPR008936);Ras GTPase-activating protein (IPR001936);CRAL-TRIO lipid binding domain (IPR001251);Ras GTPase-activating protein, conserved site (IPR023152)	--	--	Biological Process: establishment or maintenance of cell polarity (GO:0007163);; Biological Process: small GTPase mediated signal transduction (GO:0007264);; Biological Process: response to abiotic stimulus (GO:0009628);; Cellular Component: site of polarized growth (GO:0030427);; Cellular Component: intracellular part (GO:0044424);; Biological Process: regulation of cellular process (GO:0050794)…	K08052|0.0|ssl:SS1G_13541|hypothetical protein	Inhibitory regulator protein IRA1 GN=YBR1016 OS=Saccharomyces cerevisiae (strain ATCC 204508 / S288c) PE=1 SV=2	GTPase-activating protein [Blumeria graminis f. sp. tritici 96224]	Ras GTPase activating protein
SmallG3	Bgt_unigene523	EPQ67450.1	-1.3827	NS	CCU76303.1	88.49	1e-57	no hit	--	--	Biological Process: regulation of cellular process (GO:0050794);;	K08773|5e-37|ssl:SS1G_04496|hypothetical protein	--	Rho GTPase activating protein (RhoGAP) [Blumeria graminis f. sp. tritici 96224]	Rho GTPase activating protein
SmallG4	Bgt_unigene620	EPQ67353.1	1.41673	1.22987	CCU81976.1	95.05	3e-52	no hit	--	--	Molecular Function: metal ion binding (GO:0046872);;	K12492|3e-25|bfu:BC1G_01189|hypothetical protein	--	ADP-ribosylation factor GTPase activating protein [Blumeria graminis f. sp. tritici 96224]	Arf-GTPase activation protein
SmallG5	Bgt_unigene1280	EPQ66707.1	-1.09443	-1.11448	CCU75330.1	98.26	0	P-loop containing nucleoside triphosphate hydrolase (IPR027417);Bms1/Tsr1-type G domain (IPR030387);AARP2CN (IPR012948)	[J]	Translation, ribosomal structure and biogenesis	Molecular Function: GTPase activity (GO:0003924);; Molecular Function: GTP binding (GO:0005525);; Cellular Component: nucleus (GO:0005634);; Cellular Component: mitochondrion (GO:0005739);; Biological Process: GTP catabolic process (GO:0006184);; Biological Process: rRNA processing (GO:0006364);; Cellular Component: 90S preribosome (GO:0030686);; Molecular Function: U3 snoRNA binding (GO:0034511)…	K14569|1e-180|ssl:SS1G_08220|hypothetical protein	Ribosome biogenesis protein bms1 GN=bms1 OS=Schizosaccharomyces pombe (strain 972 / ATCC 24843) PE=1 SV=2	Hypothetical protein BGT96224_2647 [Blumeria graminis f. sp. tritici 96224]	Ras-type small GTPases
SmallG6	Bgt_unigene2272	EPQ65690.1	1.07448	NS	no hit	--	--	no hit	[R]	General function prediction only	Cellular Component: Golgi membrane (GO:0000139);; Biological Process: sporocarp development involved in asexual reproduction (GO:0000905);; Biological Process: cytokinetic cell separation (GO:0000920);; Molecular Function: GTPase activity (GO:0003924);; Molecular Function: signal transducer activity (GO:0004871);; Molecular Function: GTP binding (GO:0005525);; Cellular Component: intracellular (G…	K07975|1e-20|pan:PODANSg6127|hypothetical protein	GTP-binding protein rho2 (Precursor) GN=rho2 OS=Schizosaccharomyces pombe (strain 972 / ATCC 24843) PE=1 SV=1	Hypothetical protein BGT96224_5522 [Blumeria graminis f. sp. tritici 96224]	Rho GTPase activating protein
SmallG7	Bgt_unigene2846	EPQ65180.1	-4.25085	NS	CCU75564.1	94.15	2e-85	Rho GTPase activation protein (IPR008936);Rho GTPase-activating protein domain (IPR000198)	--	--	--	--	Rho-GTPase-activating protein 5 GN=rga5 OS=Schizosaccharomyces pombe (strain 972 / ATCC 24843) PE=3 SV=2	Hypothetical protein BGT96224_4013B [Blumeria graminis f. sp. tritici 96224]	Rho GTPase activating protein
SmallG8	Bgt_unigene4335	EPQ63592.1	NS	1.29568	CCU75481.1	93.67	0	Rab-GTPase-TBC domain (IPR000195)	[R]	General function prediction only	Molecular Function: Rab GTPase activator activity (GO:0005097);; Biological Process: positive regulation of Rab GTPase activity (GO:0032851);;	--	TBC domain-containing protein C1778.09 GN=SPBC1778.09 OS=Schizosaccharomyces pombe (strain 972 / ATCC 24843) PE=3 SV=1	GTPase-activating protein (GAP) [Blumeria graminis f. sp. tritici 96224]	Rab GTPase activating protein
SmallG9	Bgt_unigene4843	EPQ63292.1	-2.08774	-1.14415	CCU78261.1	94.19	0	C2 domain (IPR000008);Rho GTPase activation protein (IPR008936)	--	--	Biological Process: cellular bud site selection (GO:0000282);; Molecular Function: GTPase activator activity (GO:0005096);; Cellular Component: intracellular (GO:0005622);; Biological Process: positive regulation of GTPase activity (GO:0043547);; Biological Process: regulation of cellular process (GO:0050794);; Biological Process: regulation of small GTPase mediated signal transduction (GO:005105…	--	Inhibitory regulator protein BUD2/CLA2 GN=YKL424 OS=Saccharomyces cerevisiae (strain ATCC 204508 / S288c) PE=1 SV=2	GTPase activating factor [Blumeria graminis f. sp. tritici 96224]	Rho GTPase activating protein
SmallG10	Bgt_unigene6090	EPQ61902.1	-1.95374	NS	CCU81569.1	94.37	7e-73	Arf GTPase activating protein (IPR001164)	[U]	Intracellular trafficking, secretion, and vesicular transport	Molecular Function: ARF GTPase activator activity (GO:0008060);; Molecular Function: zinc ion binding (GO:0008270);; Biological Process: regulation of ARF GTPase activity (GO:0032312);;	--	UBA domain-containing protein 3 GN=ucp3 OS=Schizosaccharomyces pombe (strain 972 / ATCC 24843) PE=3 SV=1	Hypothetical protein BGT96224_3825 [Blumeria graminis f. sp. tritici 96224]	Arf-GTPase activation protein
GEF1	Bgt_unigene1362	EPQ66466.1	-1.30817	NS	CCU82037.1	95.32	0	GDP/GTP exchange factor Sec2, N-terminal (IPR009449)	--	--	--	--	Rab guanine nucleotide exchange factor sec2 GN=sec2 OS=Schizosaccharomyces pombe (strain 972 / ATCC 24843) PE=1 SV=1	Guanyl-nucleotide exchange factor [Blumeria graminis f. sp. tritici 96224]	Guanine nucleotide exchange factor
GEF2	Bgt_unigene4536	EPQ63483.1	-1.28981	-1.48267	CCU74442.1	93.96	0	SH3 domain (IPR001452);Ras guanine nucleotide exchange factor domain (IPR023578);Ras-like guanine nucleotide exchange factor, N-terminal (IPR000651);Ras guanine-nucleotide exchange factors catalytic domain (IPR001895)	--	--	Biological Process: intracellular signal transduction (GO:0035556);;	--	Cell division control protein 25 GN=L2142.6 OS=Saccharomyces cerevisiae (strain ATCC 204508 / S288c) PE=1 SV=1	Membrane bound guanine nucleotide exchange factor [Blumeria graminis f. sp. tritici 96224]	Guanine nucleotide exchange factor
GEF3	Bgt_unigene966	EPQ67037.1	-1.28588	NS	CCU77042.1	93.98	0	Sec7 domain (IPR000904);Sec7 domain, alpha orthogonal bundle (IPR023394);PH domain-like (IPR011993)	[R]	General function prediction only	--	--	PH and SEC7 domain-containing protein C11E3.11c GN=SPAC11E3.11c OS=Schizosaccharomyces pombe (strain 972 / ATCC 24843) PE=3 SV=1	Hypothetical protein BGT96224_A20224 [Blumeria graminis f. sp. tritici 96224]	Guanine nucleotide exchange factor
GEF4	Bgt_unigene5047	EPQ62916.1	-1.70377	-1.20633	CCU82940.1	94.78	0	Dedicator of cytokinesis (IPR026791);DOCK1 homologue (IPR031057);Dedicator of cytokinesis, N-terminal domain (IPR032376)	--	--	--	--	--	Hypothetical protein BGT96224_A20625 [Blumeria graminis f. sp. tritici 96224]	Guanine nucleotide exchange factor

## Sheet: Calium signaling
Code	DEG ID	Bgt accession No. in NCBI database	Log2(C4dpi/C3dpi)	Log2(C5dpi/C3dpi)	Bgh accession No. in NCBI database	Identity(%)	E-value	Interpro	COG class	COG class annotation	GO annotation	KEGG annotation	Swissprot annotation	Nr annotation	Putative function
CSP1	Bgt_unigene817	EPQ67161.1	1.0025	NS	CCU75043.1	92.19	6e-103	EF-hand domain pair (IPR011992);EF-hand domain (IPR002048);	--	--	Cellular Component: hyphal tip (GO:0001411);; Biological Process: developmental process (GO:0032502);; Biological Process: single-organism process (GO:0044699);; Molecular Function: metal ion binding (GO:0046872);;	--	Calmodulin OS=Pneumocystis carinii PE=3 SV=1	Calmodulin Ca++ binding protein, partial [Blumeria graminis f. sp. tritici 96224]	Calmodulin signal protein,Calmodulin
CSP2	Bgt_unigene2726	EPQ65246.1	1.05784	NS	CCU78258.1	61.11	3e-48	Cyclophilin-type peptidyl-prolyl cis-trans isomerase (IPR024936);Cyclophilin-type peptidyl-prolyl cis-trans isomerase domain (IPR002130);Cyclophilin-like domain (IPR029000);Cyclophilin-type peptidyl-prolyl cis-trans isomerase, conserved site (IPR020892)	[O]	Posttranslational modification, protein turnover, chaperones	Biological Process: protein peptidyl-prolyl isomerization (GO:0000413);; Molecular Function: nucleic acid binding (GO:0003676);; Molecular Function: peptidyl-prolyl cis-trans isomerase activity (GO:0003755);; Cellular Component: extracellular region (GO:0005576);; Cellular Component: mitochondrion (GO:0005739);; Cellular Component: endoplasmic reticulum (GO:0005783);; Biological Process: protein …	K01802|1e-103|fgr:FG00777.1|similar to S71849 peptidylprolyl isomerase (EC 5.2.1.8) A precursor, mitochondrial - cyclosporin fungus	Peptidyl-prolyl cis-trans isomerase, mitochondrial (Precursor) GN=csr-1 OS=Neurospora crassa (strain ATCC 24698 / 74-OR23-1A / CBS 708.71 / DSM PE=1 SV=1	Mitochondrial peptidyl-prolyl cis-trans isomerase (cyclophilin) [Blumeria graminis f. sp. tritici 96224]	Calmodulin signal protein,CPR1 - peptidylprolyl isomerase
CSP3	Bgt_unigene4508	EPQ63455.1	1.02044	NS	CCU74422.1	87.98	4e-136	DnaJ domain (IPR001623)	[O]	Posttranslational modification, protein turnover, chaperones	Molecular Function: binding (GO:0005488);;	--	DnaJ-like protein 1 GN=YIB4W OS=Saccharomyces cerevisiae (strain ATCC 204508 / S288c) PE=1 SV=1	Cytosolic J-domain-containing protein [Blumeria graminis f. sp. tritici 96224]	Calmodulin signal protein,DnaJ protein
CSP4	Bgt_unigene4822	EPQ63271.1	1.81335	1.47912	CCU78258.1	47.74	1e-51	Cyclophilin-type peptidyl-prolyl cis-trans isomerase (IPR024936);Cyclophilin-like domain (IPR029000);Cyclophilin-type peptidyl-prolyl cis-trans isomerase domain (IPR002130)	[O]	Posttranslational modification, protein turnover, chaperones	Molecular Function: catalytic activity (GO:0003824);; Cellular Component: extracellular region (GO:0005576);; Cellular Component: cytosol (GO:0005829);; Biological Process: cellular response to drug (GO:0035690);; Biological Process: cellular protein metabolic process (GO:0044267);;	K05864|7e-60|ssl:SS1G_04988|peptidyl-prolyl cis-trans isomerase	41 kDa peptidyl-prolyl cis-trans isomerase GN=cyp41 OS=Neurospora crassa (strain ATCC 24698 / 74-OR23-1A / CBS 708.71 / DSM PE=1 SV=1	Peptidyl-prolyl cis-trans isomerase (cyclophilin) [Blumeria graminis f. sp. tritici 96224]	Calmodulin signal protein,CPR1-peptidylprolyl isomerase
CSP5	Bgt_unigene6364	EPQ61612.1	NS	1.84582	CCU75439.1	96.21	0	Alpha-D-phosphohexomutase superfamily (IPR005841);Alpha-D-phosphohexomutase, alpha/beta/alpha I/II/III (IPR016055);Alpha-D-phosphohexomutase, alpha/beta/alpha domain I (IPR005844);Alpha-D-phosphohexomutase, alpha/beta/alpha domain II (IPR005845);Alpha-D-phosphohexomutase, alpha/beta/alpha domain III (IPR005846);Alpha-D-phosphohexomutase, C-terminal (IPR005843)	--	--	Molecular Function: magnesium ion binding (GO:0000287);; Molecular Function: phosphoglucomutase activity (GO:0004614);; Cellular Component: cytosol (GO:0005829);; Biological Process: glycogen biosynthetic process (GO:0005978);; Biological Process: trehalose biosynthetic process (GO:0005992);; Biological Process: glucose metabolic process (GO:0006006);; Biological Process: D-ribose metabolic proce…	K01835|0.0|ssl:SS1G_06474|phosphoglucomutase	Phosphoglucomutase {ECO:0000250|UniProtKB:P37012} GN=pgmA OS=Aspergillus oryzae (strain ATCC 42149 / RIB 40) PE=2 SV=1	Phosphoglucomutase [Blumeria graminis f. sp. tritici 96224]	Calmodulin signal protein,PGM2 phosphoglucomutase
HOG1	Bgt_unigene4740	EPQ63189.1	2.6711	2.06378	CCU77137.1	28.96	1e-24	Protein kinase-like domain (IPR011009);Protein kinase domain (IPR000719);Serine/threonine/dual specificity protein kinase, catalytic domain (IPR002290);Serine/threonine-protein kinase, active site (IPR008271);	[RTKL]	--	Molecular Function: protein serine/threonine kinase activity (GO:0004674);; Molecular Function: ATP binding (GO:0005524);; Biological Process: protein phosphorylation (GO:0006468);; Biological Process: cellular process (GO:0009987);; Molecular Function: transferase activity (GO:0016740);; Cellular Component: intracellular non-membrane-bounded organelle (GO:0043232);;	--	Serine/threonine-protein kinase ksp1 GN=ksp1 OS=Schizosaccharomyces pombe (strain 972 / ATCC 24843) PE=1 SV=1	Serine-threonine protein kinase [Blumeria graminis f. sp. tritici 96224]	Mitogen-activated protein kinase HOG1
PLC	Bgt_unigene6082	EPQ61894.1	NS	1.77315	no hit	--	--	PLC-like phosphodiesterase, TIM beta/alpha-barrel domain (IPR017946)	--	--	--	--	--	Hypothetical protein BGT96224_4783 [Blumeria graminis f. sp. tritici 96224]	Phospholipase C
Cn	Bgt_unigene1868	EPQ66096.1	-1.21935	NS	no hit	--	--	Metallo-dependent phosphatase-like (IPR029052);Calcineurin-like phosphoesterase domain, apaH type (IPR004843);	[T]	Signal transduction mechanisms	--	--	Putative metallophosphoesterase YNL217W (Precursor) GN=YNL217W OS=Saccharomyces cerevisiae (strain ATCC 204508 / S288c) PE=1 SV=1	Hypothetical protein BGT96224_4991 [Blumeria graminis f. sp. tritici 96224]	Calcineurin-like phosphoesterase
Crz1	Bgt_unigene4400	EPQ63575.1	-1.45746	NS	CCU78787.1	93.68	0	Zinc finger C2H2-type/integrase DNA-binding domain (IPR013087);Zinc finger, C2H2-like (IPR015880);Zinc finger, C2H2 (IPR007087);	[R]	General function prediction only	Biological Process: chlamydospore formation (GO:0001410);; Biological Process: positive regulation of T cell tolerance induction (GO:0002666);; Molecular Function: DNA binding (GO:0003677);; Cellular Component: nucleus (GO:0005634);; Biological Process: signal transduction (GO:0007165);; Biological Process: pathogenesis (GO:0009405);; Biological Process: cellular response to iron ion starvation (…	--	Transcriptional regulator CRZ1 GN=N2760 OS=Saccharomyces cerevisiae (strain ATCC 204508 / S288c) PE=1 SV=1	Transcription factor [Blumeria graminis f. sp. tritici 96224]	Transcription factor
SmallG8	Bgt_unigene4335	EPQ63592.1	NS	1.29568	CCU75481.1	93.67	0	Rab-GTPase-TBC domain (IPR000195)	[R]	General function prediction only	Molecular Function: Rab GTPase activator activity (GO:0005097);; Biological Process: positive regulation of Rab GTPase activity (GO:0032851);;	--	TBC domain-containing protein C1778.09 GN=SPBC1778.09 OS=Schizosaccharomyces pombe (strain 972 / ATCC 24843) PE=3 SV=1	GTPase-activating protein (GAP) [Blumeria graminis f. sp. tritici 96224]	Rab GTPase activating protein

## Sheet: H2O2 signaling
Code	DEG ID	Bgt accession No. in NCBI database	Log2(C4dpi/C3dpi)	Log2(C5dpi/C3dpi)	Bgh accession No. in NCBI database	Identity(%)	E-value	Interpro	COG class	COG class annotation	GO annotation	KEGG annotation	Swissprot annotation	Nr annotation	Putative function
SOD1	Bgt_unigene2956	EPQ65016.1	NS	1.1174	--	--	--	Manganese/iron superoxide dismutase (IPR001189);Manganese/iron superoxide dismutase, N-terminal (IPR019831);Manganese/iron superoxide dismutase, C-terminal (IPR019832);Manganese/iron superoxide dismutase, binding site (IPR019833)	[P]	Inorganic ion transport and metabolism	Molecular Function: superoxide dismutase activity (GO:0004784);; Cellular Component: intracellular (GO:0005622);; Biological Process: superoxide metabolic process (GO:0006801);; Molecular Function: IgE binding (GO:0019863);; Molecular Function: manganese ion binding (GO:0030145);; Biological Process: oxidation-reduction process (GO:0055114);;	K04564|1e-119|bfu:BC1G_01910|manganese superoxide dismutase	Superoxide dismutase [Mn], mitochondrial (Precursor) GN=sodB OS=Neosartorya fumigata (strain ATCC MYA-4609 / Af293 / CBS 101355 / FGSC PE=1 SV=3	Mitochondrial superoxide dismutase [Blumeria graminis f. sp. tritici 96224]	Superoxide dismutase
SOD2	Bgt_unigene3991	EPQ63972.1	1.40691	1.22043	--	--	--	Manganese/iron superoxide dismutase (IPR001189);Manganese/iron superoxide dismutase, N-terminal (IPR019831);Manganese/iron superoxide dismutase, C-terminal (IPR019832);Manganese/iron superoxide dismutase, binding site (IPR019833)	[P]	Inorganic ion transport and metabolism	Molecular Function: superoxide dismutase activity (GO:0004784);; Cellular Component: mitochondrion (GO:0005739);; Biological Process: superoxide metabolic process (GO:0006801);; Biological Process: metabolic process (GO:0008152);; Molecular Function: oxidoreductase activity (GO:0016491);; Molecular Function: IgE binding (GO:0019863);; Molecular Function: manganese ion binding (GO:0030145);; Molec…	K04564|2e-86|ncr:NCU01213|superoxide dismutase, mitochondrial precursor	Superoxide dismutase [Mn], mitochondrial (Precursor) GN=sod-2 OS=Neurospora crassa (strain ATCC 24698 / 74-OR23-1A / CBS 708.71 / DSM PE=3 SV=1	Mitochondrial superoxide dismutase [Blumeria graminis f. sp. tritici 96224]	Superoxide dismutase
CAT	Bgt_unigene5249	EPQ62743.1	-1.28724	NS	--	--	--	Catalase, mono-functional, haem-containing (IPR018028);Catalase, mono-functional, haem-containing, clade 2 (IPR024712);Catalase core domain (IPR011614);Catalase-like domain (IPR020835);Catalase immune-responsive domain (IPR010582);Class I glutamine amidotransferase-like (IPR029062);DJ-1/PfpI (IPR002818);Catalase haem-binding site (IPR002226)	[P]	Inorganic ion transport and metabolism	Molecular Function: catalase activity (GO:0004096);; Cellular Component: ascospore wall (GO:0005619);; Cellular Component: intracellular (GO:0005622);; Cellular Component: cell surface (GO:0009986);; Biological Process: cellular response to iron ion starvation (GO:0010106);; Biological Process: D-gluconate metabolic process (GO:0019521);; Molecular Function: heme binding (GO:0020037);; Biological…	K03781|0.0|bfu:BC1G_02407|hypothetical protein	Catalase-1 GN=cat-1 OS=Neurospora crassa (strain ATCC 24698 / 74-OR23-1A / CBS 708.71 / DSM PE=1 SV=2	Hypothetical protein BGT96224_A21263 [Blumeria graminis f. sp. tritici 96224]	Catalase
Prx1	Bgt_unigene4476	EPQ63503.1	1.48439	1.13581	--	--	--	Thioredoxin-like fold (IPR012336);Redoxin (IPR013740)	[O]	Posttranslational modification, protein turnover, chaperones	Cellular Component: extracellular region (GO:0005576);; Cellular Component: intracellular (GO:0005622);; Molecular Function: thioredoxin peroxidase activity (GO:0008379);; Molecular Function: IgE binding (GO:0019863);; Biological Process: cellular response to oxidative stress (GO:0034599);; Biological Process: cellular response to osmotic stress (GO:0071470);;	--	Putative peroxiredoxin pmp20 GN=pmp20 OS=Schizosaccharomyces pombe (strain 972 / ATCC 24843) PE=2 SV=2	Thiol-specific peroxiredoxin [Blumeria graminis f. sp. tritici 96224]	Peroxiredoxin
Prx2	Bgt_unigene6173	EPQ61802.1	1.24665	1.23852	--	--	--	Peroxiredoxin, AhpC-type (IPR024706);Thioredoxin-like fold (IPR012336);Alkyl hydroperoxide reductase subunit C/ Thiol specific antioxidant (IPR000866);Peroxiredoxin, C-terminal (IPR019479)	[O]	Posttranslational modification, protein turnover, chaperones	Molecular Function: peroxidase activity (GO:0004601);; Molecular Function: protein binding (GO:0005515);; Cellular Component: fungal-type cell wall (GO:0009277);; Molecular Function: antioxidant activity (GO:0016209);; Biological Process: filamentous growth of a population of unicellular organisms (GO:0044182);; Biological Process: cellular metabolic process (GO:0044237);; Cellular Component: int…	--	Mitochondrial peroxiredoxin PRX1 GN=PRX1 OS=Saccharomyces cerevisiae (strain ATCC 204508 / S288c) PE=1 SV=1	Mitochondrial peroxiredoxin [Blumeria graminis f. sp. tritici 96224]	Peroxiredoxin
Trx1	Bgt_unigene6199	EPQ61828.1	1.08295	1.27244	--	--	--	Thioredoxin (IPR005746);Thioredoxin-like fold (IPR012336);Thioredoxin domain (IPR013766)	[OC]	--	Molecular Function: catalytic activity (GO:0003824);; Biological Process: metabolic process (GO:0008152);; Biological Process: cellular process (GO:0009987);;	K03671|2e-15|mgr:MGG_04236|MG04236.4	Thioredoxin-1 GN=TRX1 OS=Saccharomyces cerevisiae (strain ATCC 204508 / S288c) PE=1 SV=3	Thioredoxin [Blumeria graminis f. sp. tritici 96224]	Thioredoxin
Trx2	Bgt_unigene6185	EPQ61814.1	NS	1.02274	--	--	--	Thioredoxin (IPR005746);Thioredoxin-like fold (IPR012336);Thioredoxin domain (IPR013766)	[OC]	--	Biological Process: nucleobase-containing compound metabolic process (GO:0006139);; Molecular Function: disulfide oxidoreductase activity (GO:0015036);; Biological Process: cellular response to oxidative stress (GO:0034599);; Biological Process: small molecule metabolic process (GO:0044281);;	K03671|4e-22|mgr:MGG_04236|MG04236.4	Thioredoxin-1 GN=trx1 OS=Schizosaccharomyces pombe (strain 972 / ATCC 24843) PE=3 SV=3	Hypothetical protein BGT96224_1789 [Blumeria graminis f. sp. tritici 96224]	Thioredoxin
Trx3	Bgt_unigene2897	EPQ65080.1	1.00615	NS	--	--	--	Thioredoxin-like ferredoxin (IPR009737);Thioredoxin-like fold (IPR012336)	--	--	--	--	Actin patches distal protein 1 GN=APD1 OS=Saccharomyces cerevisiae (strain ATCC 204508 / S288c) PE=1 SV=1	Hypothetical protein BGT96224_3441 [Blumeria graminis f. sp. tritici 96224]	Thioredoxin
Trx4	Bgt_unigene3110	EPQ64822.1	NS	1.00036	--	--	--	FAD/NAD(P)-binding domain (IPR023753);FAD-binding domain (IPR002938);Thioredoxin-like fold (IPR012336)	[HC]	--	--	--	Phenol 2-monooxygenase OS=Trichosporon cutaneum (Yeast) PE=1 SV=3	Hypothetical protein BGT96224_2922 [Blumeria graminis f. sp. tritici 96224]	Thioredoxin
Trx5	Bgt_unigene3302	EPQ64701.1	1.69745	1.23302	--	--	--	Thioredoxin (IPR005746);Thioredoxin-like fold (IPR012336);Thioredoxin domain (IPR013766);Thioredoxin, conserved site (IPR017937)	[OC]	--	Biological Process: nucleobase-containing compound metabolic process (GO:0006139);; Molecular Function: disulfide oxidoreductase activity (GO:0015036);; Biological Process: cellular response to oxidative stress (GO:0034599);; Biological Process: small molecule metabolic process (GO:0044281);;	K03671|5e-27|afv:AFLA_099150|thioredoxin m(mitochondrial)-type, putative	Thioredoxin-1 GN=trx1 OS=Schizosaccharomyces pombe (strain 972 / ATCC 24843) PE=3 SV=3	Hypothetical protein BGT96224_2090 [Blumeria graminis f. sp. tritici 96224]	Thioredoxin
Trx6	Bgt_unigene2734	EPQ65254.1	1.83949	1.53779	--	--	--	Thioredoxin-like fold (IPR012336);	--	--	--	--	--	Hypothetical protein BGT96224_1472 [Blumeria graminis f. sp. tritici 96224]	Thioredoxin
GSHR1	Bgt_unigene5584	EPQ62411.1	1.23857	1.01524	--	--	--	FAD/NAD(P)-binding domain (IPR023753);FAD/NAD-linked reductase, dimerisation domain (IPR016156);Pyridine nucleotide-disulphide oxidoreductase, dimerisation domain (IPR004099);Pyridine nucleotide-disulphide oxidoreductase, class I, active site (IPR012999)	[C]	Energy production and conversion	Molecular Function: nucleotide binding (GO:0000166);; Molecular Function: glutathione-disulfide reductase activity (GO:0004362);; Cellular Component: cytoplasm (GO:0005737);; Biological Process: glutathione metabolic process (GO:0006749);; Molecular Function: oxidoreductase activity, acting on a sulfur group of donors, NAD(P) as acceptor (GO:0016668);; Cellular Component: intracellular membrane-b…	K00383|0.0|bfu:BC1G_15101|hypothetical protein	Glutathione reductase GN=gtr-1 OS=Neurospora crassa (strain ATCC 24698 / 74-OR23-1A / CBS 708.71 / DSM PE=3 SV=1	Glutathione oxidoreductase [Blumeria graminis f. sp. tritici 96224]	Glutathione oxidoreductase
GSHR2	Bgt_unigene103	EPQ67859.1	1.00481	NS	--	--	--	Monothiol glutaredoxin-related (IPR004480);Glutaredoxin (IPR002109);Thioredoxin-like fold (IPR012336)	[O]	Posttranslational modification, protein turnover, chaperones	Cellular Component: mitochondrion (GO:0005739);; Biological Process: response to stress (GO:0006950);; Molecular Function: electron carrier activity (GO:0009055);; Biological Process: cellular process (GO:0009987);; Molecular Function: protein disulfide oxidoreductase activity (GO:0015035);; Biological Process: cell redox homeostasis (GO:0045454);; Molecular Function: iron-sulfur cluster binding …	K07390|5e-68|pno:SNOG_04939|hypothetical protein	Monothiol glutaredoxin-5, mitochondrial (Precursor) GN=GRX5 OS=Lachancea kluyveri (Yeast) PE=3 SV=1	Glutathione-dependent oxidoreductase [Blumeria graminis f. sp. tritici 96224]	Glutathione oxidoreductase
Grx1	Bgt_unigene1591	EPQ66360.1	1.15762	NS	--	--	--	Thioredoxin-like fold (IPR012336);Glutaredoxin (IPR002109);Glutaredoxin subgroup (IPR014025);Glutaredoxin, eukaryotic/virial (IPR011899);Glutaredoxin active site (IPR011767)	[O]	Posttranslational modification, protein turnover, chaperones	Molecular Function: electron carrier activity (GO:0009055);; Molecular Function: protein disulfide oxidoreductase activity (GO:0015035);; Biological Process: cell redox homeostasis (GO:0045454);;	K03676|2e-43|ani:AN4215.2|hypothetical protein	Glutaredoxin-2 GN=grx2 OS=Schizosaccharomyces pombe (strain 972 / ATCC 24843) PE=3 SV=1	Cytoplasmic glutaredoxin thioltransferase glutathione-dependent disulfide oxidoreductase [Blumeria graminis f. sp. tritici 96224]	Glutaredoxin
NoxA	Bgt_unigene6315	EPQ61671.1	-1.14075	NS	--	--	--	Ferric reductase transmembrane component-like domain (IPR013130);Riboflavin synthase-like beta-barrel (IPR017938);Ferredoxin reductase-type FAD-binding domain (IPR017927);FAD-binding 8 (IPR013112);Ferric reductase, NAD binding domain (IPR013121)	--	--	Cellular Component: integral component of membrane (GO:0016021);; Molecular Function: oxidoreductase activity (GO:0016491);; Biological Process: oxidation-reduction process (GO:0055114);;	K08008|0.0|bfu:BC1G_10823|hypothetical protein	Ferric/cupric reductase transmembrane component 2 GN=frp2 OS=Schizosaccharomyces pombe (strain 972 / ATCC 24843) PE=3 SV=1	Cytochrome b-245 heavy chain subunit beta [Blumeria graminis f. sp. tritici 96224]	NADPH oxidase
HSK	Bgt_unigene984	EPQ67055.1	-1.62713	-1.36694	--	--	--	GAF domain-like (IPR029016);GAF domain (IPR003018);Signal transduction histidine kinase, dimerisation/phosphoacceptor domain (IPR003661);Histidine kinase domain (IPR005467);Histidine kinase-like ATPase, C-terminal domain (IPR003594);Signal transduction histidine kinase-related protein, C-terminal (IPR004358);CheY-like superfamily (IPR011006);Signal transduction response regulator, receiver domain…	[T]	Signal transduction mechanisms	Molecular Function: phosphorelay sensor kinase activity (GO:0000155);; Molecular Function: phosphorelay response regulator activity (GO:0000156);; Biological Process: phosphorelay signal transduction system (GO:0000160);; Biological Process: developmental process involved in reproduction (GO:0003006);; Molecular Function: protein histidine kinase activity (GO:0004673);; Molecular Function: signal…	--	Two-component system protein A OS=Emericella nidulans (strain FGSC A4 / ATCC 38163 / CBS 112.46 / NRRL PE=3 SV=2	Hypothetical protein BGT96224_5386B [Blumeria graminis f. sp. tritici 96224]	Histidine kinase
HOG1	Bgt_unigene4740	EPQ63189.1	2.6711	2.06378	--	--	--	Protein kinase-like domain (IPR011009);Protein kinase domain (IPR000719);Serine/threonine/dual specificity protein kinase, catalytic domain (IPR002290);Serine/threonine-protein kinase, active site (IPR008271);	[RTKL]	--	Molecular Function: protein serine/threonine kinase activity (GO:0004674);; Molecular Function: ATP binding (GO:0005524);; Biological Process: protein phosphorylation (GO:0006468);; Biological Process: cellular process (GO:0009987);; Molecular Function: transferase activity (GO:0016740);; Cellular Component: intracellular non-membrane-bounded organelle (GO:0043232);;	--	Serine/threonine-protein kinase ksp1 GN=ksp1 OS=Schizosaccharomyces pombe (strain 972 / ATCC 24843) PE=1 SV=1	Serine-threonine protein kinase [Blumeria graminis f. sp. tritici 96224]	Mitogen-activated protein kinase HOG1
TF31	Bgt_unigene2260	EPQ65678.1	-1.7664	-1.33926	--	--	--	no hit	--	--	--	--	--	Hypothetical protein BGT96224_3774 [Blumeria graminis f. sp. tritici 96224]	Transcription factor (YAP homolog)
TF32	Bgt_unigene5200	EPQ62785.1	-1.08621	NS	--	--	--	Basic-leucine zipper domain(IPR004827)	--	--	--	--	--	Hypothetical protein BGT96224_A20301 [Blumeria graminis f. sp. tritici 96224]	Transcription factor (YAP homolog)

## Sheet: Phosphoinositide signaling
Code	DEG ID	Bgt accession No. in NCBI database	Log2(C4dpi/C3dpi)	Log2(C5dpi/C3dpi)	Bgh accession No. in NCBI database	Identity(%)	E-value	Interpro	COG class	COG class annotation	GO annotation	KEGG annotation	Swissprot annotation	Nr annotation	Putative function
PIPP1	Bgt_unigene2210	EPQ65797.1	-1.30745	NS	--	--	--	Endonuclease/exonuclease/phosphatase (IPR005135);Inositol polyphosphate-related phosphatase (IPR000300)	--	--	--	--	Phosphatidylinositol 4,5-bisphosphate 5-phosphatase GN=YOR3231w OS=Saccharomyces cerevisiae (strain ATCC 204508 / S288c) PE=1 SV=1	Polyphosphatidylinositol phosphatase [Blumeria graminis f. sp. tritici 96224]	Phosphoinositide 5-phosphatase	Phosphoinositide 5-phosphatase
PIPP2	Bgt_unigene6093	EPQ61905.1	-2.35439	-1.54316	--	--	--	Endonuclease/exonuclease/phosphatase (IPR005135);Inositol polyphosphate-related phosphatase (IPR000300)	[T]	Signal transduction mechanisms	Molecular Function: endonuclease activity (GO:0004519);; Molecular Function: exonuclease activity (GO:0004527);; Biological Process: phosphatidylinositol dephosphorylation (GO:0046856);;	--	Probable inositol polyphosphate 5-phosphatase C9G1.10c GN=SPAC9G1.10c OS=Schizosaccharomyces pombe (strain 972 / ATCC 24843) PE=1 SV=2	Polyphosphatidylinositol phosphatase [Blumeria graminis f. sp. tritici 96224]	Phosphoinositide 5-phosphatase	Phosphoinositide 5-phosphatase
PIPP3	Bgt_unigene2909	EPQ65057.1	1.61315	1.23713	--	--	--	Myotubularin family (IPR030564);Protein-tyrosine phosphatase-like (IPR029021);Myotubularin-like phosphatase domain (IPR010569);Protein-tyrosine phosphatase, active site (IPR016130)	--	--	Biological Process: dephosphorylation (GO:0016311);; Molecular Function: phosphatase activity (GO:0016791);;	--	Phosphoinositide 3-phosphatase GN=SPAC19A8.03 OS=Schizosaccharomyces pombe (strain 972 / ATCC 24843) PE=3 SV=1	Hypothetical protein BGT96224_1133 [Blumeria graminis f. sp. tritici 96224]	Phosphoinositide 3-phosphatase	Phosphoinositide 3-phosphatase
PIBP1	Bgt_unigene3303	EPQ64702.1	1.19337	1.0927	--	--	--	PH domain-like (IPR011993);Pleckstrin homology domain (IPR001849);	--	--	--	--	FYVE-type zinc finger-containing protein C9B6.03 GN=SPBC9B6.03 OS=Schizosaccharomyces pombe (strain 972 / ATCC 24843) PE=1 SV=1	Protein binding phosphatidylinositol 3-phosphate [Blumeria graminis f. sp. tritici 96224]	Phosphatidylinositol binding protein	Phosphatidylinositol binding protein
PIBP2	Bgt_unigene4483	EPQ63500.1	NS	1.07439	--	--	--	PH domain-like (IPR011993);Pleckstrin homology domain (IPR001849)	--	--	Cellular Component: mitochondrion (GO:0005739);; Cellular Component: plasma membrane (GO:0005886);; Biological Process: establishment or maintenance of actin cytoskeleton polarity (GO:0030950);; Molecular Function: phosphatidylinositol binding (GO:0035091);; Biological Process: phosphatidylinositol-mediated signaling (GO:0048015);;	--	Cytoskeletal signaling protein slm1 GN=slm1 OS=Schizosaccharomyces pombe (strain 972 / ATCC 24843) PE=1 SV=1	Hypothetical protein BGT96224_A20827 [Blumeria graminis f. sp. tritici 96224]	Phosphatidylinositol binding protein	Phosphatidylinositol binding protein
PIBP3	Bgt_unigene6280	EPQ61730.1	1.11519	NS	--	--	--	Profilin (IPR005455);Profilin conserved site (IPR027310)	--	--	Molecular Function: binding (GO:0005488);; Biological Process: cellular process (GO:0009987);; Molecular Function: transferase activity, transferring phosphorus-containing groups (GO:0016772);;	K05759|1e-37|cpw:CPC735_064080|Profilin II, putative	Profilin GN=cdc3 OS=Schizosaccharomyces pombe (strain 972 / ATCC 24843) PE=1 SV=1	Profilin actin- and phosphatidylinositol 45-bisphosphate-binding protein [Blumeria graminis f. sp. tritici 96224]	Phosphatidylinositol binding protein	Phosphatidylinositol binding protein
IPK	Bgt_unigene3709	EPQ64267.1	1.00711	NS	--	--	--	Inositol polyphosphate kinase (IPR005522)	--	--	--	--	Inositol polyphosphate multikinase GN=YD9395.06C OS=Saccharomyces cerevisiae (strain ATCC 204508 / S288c) PE=1 SV=1	Inositol polyphosphate multikinase [Blumeria graminis f. sp. tritici 96224]	Inositol polyphosphate kinase	Inositol polyphosphate kinase
PLC	Bgt_unigene6082	EPQ61894.1	NS	1.77315	--	--	--	PLC-like phosphodiesterase, TIM beta/alpha-barrel domain (IPR017946)	--	--	--	--	--	Hypothetical protein BGT96224_4783 [Blumeria graminis f. sp. tritici 96224]	Phospholipase C	Phospholipase C
PKC	Bgt_unigene4209	EPQ63768.1	-1.73716	-1.32927	--	--	--	HR1 rho-binding repeat (IPR011072);	--	--	Molecular Function: nucleotide binding (GO:0000166);; Molecular Function: protein serine/threonine kinase activity (GO:0004674);; Molecular Function: ATP binding (GO:0005524);; Biological Process: protein phosphorylation (GO:0006468);; Biological Process: signal transduction (GO:0007165);; Biological Process: phosphorylation (GO:0016310);; Biological Process: intracellular signal transduction (GO…	K02677|5e-99|bfu:BC1G_07478|similar to protein kinase C	Protein kinase C-like GN=pkc1 OS=Hypocrea jecorina (Trichoderma reesei) PE=3 SV=1	Serine-threonine kinase [Blumeria graminis f. sp. tritici 96224]	Protein kinase C	Protein kinase C
Sgk2(1)	Bgt_unigene2024	EPQ65956.1	1.7535	1.29138	--	--	--	Protein kinase-like domain (IPR011009);Tyrosine-protein kinase, active site (IPR008266)	--	--	--	--	--	Hypothetical protein BGT96224_389, partial [Blumeria graminis f. sp. tritici 96224]	Serine/threonine protein kinase Sgk2	Serine/threonine protein kinase Sgk2
Sgk2(2)	Bgt_unigene2651	EPQ65350.1	1.96646	1.31568	--	--	--	Protein kinase-like domain (IPR011009);Tyrosine-protein kinase, active site (IPR008266)	--	--	--	--	--	Hypothetical protein BGT96224_4306 [Blumeria graminis f. sp. tritici 96224]	Serine/threonine-protein kinase Sgk2	Serine/threonine-protein kinase Sgk2

## Sheet: Transcription regulator
Code	DEG ID	Bgt accession No. in NCBI database	Log2(C4dpi/C3dpi)	Log2(C5dpi/C3dpi)	Bgh accession No. in NCBI database	Identity(%)	E-value	Interpro	COG class	COG class annotation	GO annotation	KEGG annotation	Swissprot annotation	Nr annotation	Putative function
TF1	Bgt_unigene379	EPQ67597.1	3.81323	6.77124	CCU77046.1	98.35	0	CP2 transcription factor (IPR007604) CP2 transcription factor (IPR007604)	--	--	--	--	--	Hypothetical protein BGT96224_4869 [Blumeria graminis f. sp. tritici 96224]	Transcription factor
TF2	Bgt_unigene423	EPQ67550.1	1.8765	1.88194	CCU76852.1	22.57	4e-13	Zn(2)-C6 fungal-type DNA-binding domain (IPR001138);Transcription factor domain, fungi (IPR007219)	--	--	Molecular Function: binding (GO:0005488);; Biological Process: transcription, DNA-templated (GO:0006351);; Biological Process: regulation of biological process (GO:0050789);;	--	Uncharacterized transcriptional regulatory protein C530.08 GN=SPBC530.08 OS=Schizosaccharomyces pombe (strain 972 / ATCC 24843) PE=3 SV=1	Hypothetical protein BGT96224_2003 [Blumeria graminis f. sp. tritici 96224]	Transcription factor
TF3	Bgt_unigene437	EPQ67538.1	NS	1.60877	CCU74403.1	92.74	0	Zinc finger C2H2-type/integrase DNA-binding domain (IPR013087);Zinc finger, C2H2-like (IPR015880);Zinc finger, C2H2 (IPR007087)	--	--	Molecular Function: sequence-specific DNA binding (GO:0043565);; Biological Process: primary metabolic process (GO:0044238);; Biological Process: cellular macromolecule metabolic process (GO:0044260);;	--	Transcriptional regulator RPN4 GN=RPN4 OS=Candida albicans (strain SC5314 / ATCC MYA-2876) PE=1 SV=1	Hypothetical protein BGT96224_2435 [Blumeria graminis f. sp. tritici 96224]	Transcription factor
TF4	Bgt_unigene518	EPQ67456.1	-1.03209	NS	no hit	--	--	Transcription factor Spt20 (IPR021950)	--	--	Molecular Function: sequence-specific DNA binding transcription factor activity (GO:0003700);; Molecular Function: catalytic activity (GO:0003824);; Cellular Component: cytoplasm (GO:0005737);; Biological Process: cellular response to DNA damage stimulus (GO:0006974);; Biological Process: cell communication (GO:0007154);; Cellular Component: NuA4 histone acetyltransferase complex (GO:0035267);; M…	K11361|1e-110|pan:PODANSg6998|hypothetical protein	SAGA complex subunit spt20 GN=spt20 OS=Schizosaccharomyces pombe (strain 972 / ATCC 24843) PE=1 SV=1	Hypothetical protein BGT96224_4146 [Blumeria graminis f. sp. tritici 96224]	Transcription factor
TF5	Bgt_unigene728	EPQ67246.1	-1.15635	NS	CCU75053.1	99	0	Homeodomain-like (IPR009057);Homeobox domain (IPR001356);Homeobox, conserved site (IPR017970)	[K]	Transcription	Molecular Function: sequence-specific DNA binding transcription factor activity (GO:0003700);; Cellular Component: nucleus (GO:0005634);; Biological Process: regulation of transcription, DNA-templated (GO:0006355);; Molecular Function: sequence-specific DNA binding (GO:0043565);;	--	Homeobox protein HOY1 GN=HOY1 OS=Yarrowia lipolytica (strain CLIB 122 / E 150) PE=3 SV=2	Homeobox transcription factor, partial [Blumeria graminis f. sp. tritici 96224]	Transcription factor
TF6	Bgt_unigene970	EPQ67041.1	NS	1.14541	CCU75597.1	81.68	0	Basic-leucine zipper domain (IPR004827)	--	--	--	--	Cross-pathway control protein 1 GN=cpc-1 OS=Neurospora crassa (strain ATCC 24698 / 74-OR23-1A / CBS 708.71 / DSM PE=1 SV=2	Cross-pathway control protein [Blumeria graminis f. sp. tritici 96224]	Transcription factor
TF7	Bgt_unigene1335	EPQ66637.1	-1.01901	-1.24818	CCU79063.1	94.49	0	Zn(2)-C6 fungal-type DNA-binding domain (IPR001138);Transcription factor domain, fungi (IPR007219);Transcription factor domain, fungi (IPR007219);	--	--	--	--	Transcriptional activator protein acu-15 GN=acu-15 OS=Neurospora crassa (strain ATCC 24698 / 74-OR23-1A / CBS 708.71 / DSM PE=1 SV=2	Hypothetical protein BGT96224_5354 [Blumeria graminis f. sp. tritici 96224]	Transcription factor
TF8	Bgt_unigene1421	EPQ66525.1	-1.98547	NS	CCU82694.1	96.35	0	Zn(2)-C6 fungal-type DNA-binding domain (IPR001138)	--	--	--	--	Protein transport protein SEC31 GN=SEC31 OS=Magnaporthe oryzae (strain 70-15 / ATCC MYA-4617 / FGSC 8958) PE=3 SV=1	Hypothetical protein BGT96224_4635 [Blumeria graminis f. sp. tritici 96224]	Transcription factor
TF9	Bgt_unigene1429	EPQ66533.1	-1.19564	-1.10745	CCU82700.1	93.11	0	no hit	--	--	--	--	--	Hypothetical protein BGT96224_4612 [Blumeria graminis f. sp. tritici 96224]	Transcription factor
TF10	Bgt_unigene1543	EPQ66411.1	1.30259	1.34315	CCU76873.1	95.69	0	no hit	--	--	Biological Process: regulation of transcription, DNA-templated (GO:0006355);; Biological Process: transcription from RNA polymerase II promoter (GO:0006366);;	--	--	Hypothetical protein BGT96224_5170 [Blumeria graminis f. sp. tritici 96224]	Transcription factor
TF11	Bgt_unigene1738	EPQ66223.1	1.51363	NS	CCU82311.1	97.79	0	ARID DNA-binding domain (IPR001606);Armadillo-type fold (IPR016024);DNA-binding RFX-type winged-helix domain (IPR003150)	--	--	--	K11763|0.0|bfu:BC1G_05023|hypothetical protein	Chromatin structure-remodeling complex subunit rsc9 GN=rsc9 OS=Schizosaccharomyces pombe (strain 972 / ATCC 24843) PE=1 SV=1	Component of the RSC chromatin remodeling complex [Blumeria graminis f. sp. tritici 96224]	Transcription factor
TF12	Bgt_unigene1798	EPQ66190.1	NI	NI	no hit	--	--	Aflatoxin biosynthesis regulatory protein (IPR002409);Aflatoxin biosynthesis regulatory protein (IPR002409);Zn(2)-C6 fungal-type DNA-binding domain (IPR001138)	--	--	Molecular Function: binding (GO:0005488);; Biological Process: transcription, DNA-templated (GO:0006351);; Biological Process: regulation of transcription, DNA-templated (GO:0006355);; Biological Process: positive regulation of cellular biosynthetic process (GO:0031328);; Biological Process: regulation of secondary metabolic process (GO:0043455);; Biological Process: secondary metabolite biosynth…	--	Aflatoxin biosynthesis regulatory protein GN=aflR OS=Aspergillus flavus (strain ATCC 200026 / FGSC A1120 / NRRL 3357 / JCM PE=3 SV=2	Hypothetical protein BGT96224_A20237 [Blumeria graminis f. sp. tritici 96224]	Transcription factor
TF13	Bgt_unigene1803	EPQ66195.1	NI	-2.36347	CCU75796.1	95.78	0	ARID DNA-binding domain (IPR001606);Armadillo-type fold (IPR016024);DNA-binding RFX-type winged-helix domain (IPR003150)	--	--	Biological Process: cellular process (GO:0009987);; Biological Process: single-organism process (GO:0044699);;	K11771|0.0|ssl:SS1G_11858|hypothetical protein	SWI/SNF chromatin-remodeling complex subunit sol1 GN=sol1 OS=Schizosaccharomyces pombe (strain 972 / ATCC 24843) PE=1 SV=1	Subunit of the SWI-SNF chromatin remodeling complex [Blumeria graminis f. sp. tritici 96224]	Transcription factor
TF14	Bgt_unigene1863	EPQ66091.1	-2.62765	-1.81179	CCU82848.1	94.31	0	p53-like transcription factor, DNA-binding (IPR008967);NDT80 DNA-binding domain (IPR024061)	--	--	--	--	Transcription factor vib-1 GN=vib-1 OS=Neurospora crassa (strain ATCC 24698 / 74-OR23-1A / CBS 708.71 / DSM PE=3 SV=1	Hypothetical protein BGT96224_3549 [Blumeria graminis f. sp. tritici 96224]	Transcription factor
TF15	Bgt_unigene2007	EPQ65988.1	-1.5247	NS	CCU76478.1	90.14	0	Vps72/YL1 family (IPR008895);Vps72/YL1 family (IPR008895);Vps72/YL1, C-terminal (IPR013272)	--	--	--	K11664|1e-114|bfu:BC1G_15548|hypothetical protein	Vacuolar protein sorting-associated protein 72 GN=VPS72 OS=Saccharomyces cerevisiae (strain ATCC 204508 / S288c) PE=1 SV=2	Hypothetical protein BGT96224_422 [Blumeria graminis f. sp. tritici 96224]	Transcription factor
TF16	Bgt_unigene2864	EPQ65128.1	-1.11492	-1.13438	CCU81695.1	98	0	Zn(2)-C6 fungal-type DNA-binding domain (IPR001138);Transcription factor domain, fungi (IPR007219)	--	--	Biological Process: transcription, DNA-templated (GO:0006351);;	--	Uncharacterized transcriptional regulatory protein C530.05 GN=SPBC530.05 OS=Schizosaccharomyces pombe (strain 972 / ATCC 24843) PE=3 SV=2	Hypothetical protein BGT96224_A20647 [Blumeria graminis f. sp. tritici 96224]	Transcription factor
TF17	Bgt_unigene2913	EPQ65061.1	NI	NS	CCU82665.1	38.98	2e-19	Zinc finger C2H2-type/integrase DNA-binding domain (IPR013087)；Zinc finger, C2H2-like (IPR015880)；Zinc finger, C2H2 (IPR007087)	[R]	General function prediction only	Biological Process: negative regulation of transcription from RNA polymerase II promoter (GO:0000122);; Cellular Component: nuclear chromatin (GO:0000790);; Biological Process: sporocarp development involved in asexual reproduction (GO:0000905);; Biological Process: chlamydospore formation (GO:0001410);; Biological Process: autolysis (GO:0001896);; Molecular Function: double-stranded DNA binding …	--	Transcription factor IIIA GN=sfc2 OS=Schizosaccharomyces pombe (strain 972 / ATCC 24843) PE=2 SV=1	Transcription factor IIIA [Blumeria graminis f. sp. tritici 96224]	Transcription factor
TF18	Bgt_unigene3287	EPQ64686.1	-1.15431	NS	CCU76723.1	92.82	8e-145	Zinc finger C2H2-type/integrase DNA-binding domain (IPR013087)；Zinc finger, C2H2-like (IPR015880)；Zinc finger, C2H2 (IPR007087)	[R]	General function prediction only	--	--	Transcription factor IIIA GN=sfc2 OS=Schizosaccharomyces pombe (strain 972 / ATCC 24843) PE=2 SV=1	Zinc-finger transcription factor [Blumeria graminis f. sp. tritici 96224]	Transcription factor
TF19	Bgt_unigene3415	EPQ64562.1	-1.18318	-1.02067	CCU75960.1	97.01	0	Zinc finger C2H2-type/integrase DNA-binding domain (IPR013087);Zinc finger, C2H2-like (IPR015880);Zinc finger, C2H2 (IPR007087)	[R]	General function prediction only	Molecular Function: nucleic acid binding (GO:0003676);; Biological Process: regulation of transcription, DNA-templated (GO:0006355);; Biological Process: transcription from RNA polymerase II promoter (GO:0006366);; Biological Process: response to stress (GO:0006950);; Biological Process: response to pH (GO:0009268);; Biological Process: response to external stimulus (GO:0009605);; Biological Proc…	--	DNA-binding protein scr1 GN=scr1 OS=Schizosaccharomyces pombe (strain 972 / ATCC 24843) PE=3 SV=1	Hypothetical protein BGT96224_1977 [Blumeria graminis f. sp. tritici 96224]	Transcription factor
TF20	Bgt_unigene3471	EPQ64546.1	-2.22523	-1.27573	CCU74859.1	90.41	0	Zinc finger, NF-X1-type (IPR000967);R3H domain (IPR001374);Zinc finger, PHD-type, conserved site (IPR019786)	--	--	Molecular Function: binding (GO:0005488);;	K12236|0.0|bfu:BC1G_00329|hypothetical protein	FKBP12-associated protein 1 homolog GN=fap1 OS=Schizosaccharomyces pombe (strain 972 / ATCC 24843) PE=1 SV=1	Hypothetical protein BGT96224_5026 [Blumeria graminis f. sp. tritici 96224]	Transcription factor
TF21	Bgt_unigene3487	EPQ64499.1	-1.18955	NS	CCU81917.1	98.42	0	CCR4-NOT transcription complex subunit 1, HEAT repeat (IPR032194);CCR4-NOT transcription complex subunit 1, TTP binding domain (IPR032193);CCR4-NOT transcription complex subunit 1, CAF1-binding domain (IPR032191);CCR4-Not complex, Not1 subunit, domain of unknown function DUF3819 (IPR024557);CCR4-Not complex component, Not1, C-terminal (IPR007196)	[DK]	--	--	K12604|0.0|ssl:SS1G_06643|hypothetical protein	General negative regulator of transcription subunit 1 GN=not1 OS=Schizosaccharomyces pombe (strain 972 / ATCC 24843) PE=1 SV=1	Component of the CCR4-NOT complex [Blumeria graminis f. sp. tritici 96224]	Transcription factor
TF22	Bgt_unigene4016	EPQ63997.1	NS	1.05131	CCU76019.1	35.97	1e-52	Zn(2)-C6 fungal-type DNA-binding domain (IPR001138)	--	--	Molecular Function: DNA binding (GO:0003677);; Molecular Function: sequence-specific DNA binding transcription factor activity (GO:0003700);; Biological Process: transcription, DNA-templated (GO:0006351);; Biological Process: regulation of transcription from RNA polymerase II promoter (GO:0006357);; Biological Process: oligosaccharide metabolic process (GO:0009311);; Biological Process: positive …	--	Putative transcriptional regulatory protein C16G5.16 GN=SPBC16G5.16 OS=Schizosaccharomyces pombe (strain 972 / ATCC 24843) PE=1 SV=1	Hypothetical protein BGT96224_A21142 [Blumeria graminis f. sp. tritici 96224]	Transcription factor
TF23	Bgt_unigene4101	EPQ63881.1	-1.78574	-1.64414	CCU77339.1	92	0	Homeodomain-like (IPR009057);Homeobox domain (IPR001356)	[K]	Transcription	--	--	Homeobox transcription factor phx1 GN=phx1 OS=Schizosaccharomyces pombe (strain 972 / ATCC 24843) PE=3 SV=1	Hypothetical protein BGT96224_554 [Blumeria graminis f. sp. tritici 96224]	Transcription factor
TF24	Bgt_unigene4217	EPQ63776.1	NI	-1.82451	CCU75948.1	59.65	5e-13	Zinc finger C2H2-type/integrase DNA-binding domain (IPR013087);Zinc finger, C2H2-like (IPR015880);Zinc finger, C2H2 (IPR007087)	[R]	General function prediction only	Biological Process: sporocarp development involved in sexual reproduction (GO:0000909);; Molecular Function: sequence-specific DNA binding transcription factor activity (GO:0003700);; Cellular Component: nucleus (GO:0005634);; Cellular Component: cytosol (GO:0005829);; Biological Process: chromatin remodeling (GO:0006338);; Biological Process: regulation of transcription, DNA-templated (GO:000635…	K09467|1e-122|ssl:SS1G_09934|DNA-binding protein creA	DNA-binding protein creA GN=creA OS=Botryotinia fuckeliana (Noble rot fungus) PE=3 SV=1	Transcription factor [Blumeria graminis f. sp. tritici 96224]	Transcription factor
TF25	Bgt_unigene4400	EPQ63575.1	-1.45746	NS	CCU78787.1	93.68	0	Zinc finger C2H2-type/integrase DNA-binding domain (IPR013087);Zinc finger, C2H2-like (IPR015880);Zinc finger, C2H2 (IPR007087);	[R]	General function prediction only	Biological Process: chlamydospore formation (GO:0001410);; Biological Process: positive regulation of T cell tolerance induction (GO:0002666);; Molecular Function: DNA binding (GO:0003677);; Cellular Component: nucleus (GO:0005634);; Biological Process: signal transduction (GO:0007165);; Biological Process: pathogenesis (GO:0009405);; Biological Process: cellular response to iron ion starvation (…	--	Transcriptional regulator CRZ1 GN=N2760 OS=Saccharomyces cerevisiae (strain ATCC 204508 / S288c) PE=1 SV=1	Transcription factor [Blumeria graminis f. sp. tritici 96224]	Transcription factor
TF26	Bgt_unigene4750	EPQ63199.1	-2.34324	-1.01971	CCU81699.1	91.03	0	SMAD/FHA domain (IPR008984);Forkhead-associated (FHA) domain (IPR000253);Winged helix-turn-helix DNA-binding domain (IPR011991);Fork head domain (IPR001766)	--	--	Biological Process: transcription, DNA-templated (GO:0006351);; Biological Process: single-organism process (GO:0044699);; Biological Process: regulation of cellular process (GO:0050794);;	--	Pre-rRNA-processing protein FHL1 GN=FHL1 OS=Saccharomyces cerevisiae (strain ATCC 204508 / S288c) PE=1 SV=1	Transcriptional activator [Blumeria graminis f. sp. tritici 96224]	Transcription factor
TF27	Bgt_unigene4866	EPQ63060.1	-1.13297	NS	CCU82489.1	97.47	0	Zn(2)-C6 fungal-type DNA-binding domain (IPR001138);Transcription factor domain, fungi (IPR007219)	--	--	Biological Process: disaccharide metabolic process (GO:0005984);; Biological Process: regulation of transcription, DNA-templated (GO:0006355);; Biological Process: transcription from RNA polymerase II promoter (GO:0006366);; Biological Process: filamentous growth of a population of unicellular organisms (GO:0044182);; Biological Process: single-organism cellular process (GO:0044763);; Molecular F…	--	Maltose fermentation regulatory protein MAL13 GN=MAL13 OS=Saccharomyces cerevisiae (strain ATCC 204508 / S288c) PE=3 SV=1	MAL-activator protein [Blumeria graminis f. sp. tritici 96224]	Transcription factor
TF28	Bgt_unigene4877	EPQ63071.1	-1.04608	NS	CCU82473.1	91.25	0	Homeodomain-like (IPR009057);SANT/Myb domain (IPR001005);Myb domain (IPR017930)	--	--	--	--	Meiotically up-regulated gene 152 protein GN=mug152 OS=Schizosaccharomyces pombe (strain 972 / ATCC 24843) PE=1 SV=1	Hypothetical protein BGT96224_2898 [Blumeria graminis f. sp. tritici 96224]	Transcription factor
TF29	Bgt_unigene5090	EPQ62896.1	NS	1.16331	CCU77183.1	91	0	no hit	--	--	Biological Process: cellular process (GO:0009987);; Biological Process: primary metabolic process (GO:0044238);; Biological Process: organic substance biosynthetic process (GO:1901576);;	--	Regulator of drug sensitivity 2 GN=RDS2 OS=Saccharomyces cerevisiae (strain ATCC 204508 / S288c) PE=1 SV=2	Zinc cluster transcriptional activator [Blumeria graminis f. sp. tritici 96224]	Transcription factor
TF30	Bgt_unigene6154	EPQ61783.1	NS	-1.38353	CCU75633.1	94.59	8e-116	Zinc finger, CCHC-type (IPR001878)	[OU]	--	Molecular Function: nucleic acid binding (GO:0003676);; Molecular Function: binding (GO:0005488);; Molecular Function: metal ion binding (GO:0046872);;	K09250|2e-94|ssl:SS1G_04861|hypothetical protein	Cellular nucleic acid-binding protein homolog GN=byr3 OS=Schizosaccharomyces pombe (strain 972 / ATCC 24843) PE=3 SV=1	Hypothetical protein BGT96224_A20671 [Blumeria graminis f. sp. tritici 96224]	Transcription factor
TF31	Bgt_unigene2260	EPQ65678.1	-1.7664	-1.33926	no hit	--	--	no hit	--	--	--	--	--	Hypothetical protein BGT96224_3774 [Blumeria graminis f. sp. tritici 96224]	Transcription factor
TF32	Bgt_unigene5200	EPQ62785.1	-1.08621	NS	no hit	--	--	Basic-leucine zipper domain(IPR004827)	--	--	--	--	--	Hypothetical protein BGT96224_A20301 [Blumeria graminis f. sp. tritici 96224]	Transcription factor
TF33	Bgt_unigene6481	EPQ61580.1	-1.42887	-1.38646	no hit	--	--	Basic-leucine zipper domain(IPR004827)	--	--	--	--	--	Hypothetical protein BGT96224_A20870 [Blumeria graminis f. sp. tritici 96224]	Transcription factor
VelB	Bgt_unigene2430	EPQ65573.1	5.06078	6.1873	no hit	--	--	--	--	--	--	--	--	Hypothetical protein BGT96224_1799, partial [Blumeria graminis f. sp. tritici 96224]	Velvet protein
VosA	Bgt_unigene4227	EPQ63747.1	3.9413	4.46754	no hit	--	--	--	--	--	--	--	--	Hypothetical protein BGT96224_3878 [Blumeria graminis f. sp. tritici 96224]	Velvet protein
LaeA	Bgt_unigene4487	EPQ63484.1	NS	1.73679	no hit	--	--	--	--	--	--	--	--	Hypothetical protein BGT96224_A20067 [Blumeria graminis f. sp. tritici 96224]	Velvet protein
